# Supplementary material for: Bidirectional particle transport and size selective sorting of Brownian particles in a flashing spatially periodic energy landscape
Source: Royal Society of Chemistry journal article supplement (doi:10.1039/c6cp05599k), 2016-01-01
Supplement: c6cp05599k1.pdf [file c6cp05599k1.pdf]

Supporting Information for the article:

**Bidirectional particle transport and size selective sorting of Brownian particles in a flashing spatially periodic energy landscape**

*Fernando Martínez-Pedrero,<sup>1</sup> Helena Massana-Cid,<sup>1</sup> T. Ziegler,<sup>2</sup> Tom H. Johansen,<sup>3</sup> Arthur V. Straube<sup>1,4</sup> Pietro Tierno<sup>1,5,\*</sup>*

<sup>1</sup>Departament de Física de la Matèria Condensada, Universitat de Barcelona, Av.Diagonal 647, 08028, Barcelona, Spain.

E-mail: ptierno@ub.edu

<sup>2</sup> Department of Physics, Humboldt-Universität zu Berlin, Newtonstr. 15, 12489 Berlin, Germany.

<sup>3</sup> Department of Physics, The University of Oslo, P.O. Box 1048 Blindern, 0316 Oslo, Norway.

<sup>4</sup>Department of Mathematics and Computer Science, Freie Universität Berlin, Arnimallee 6, 14195 Berlin, Germany

<sup>5</sup>Institut de Nanociència i Nanotecnologia, IN2UB, Universitat de Barcelona, Av. Diagonal 647, 08028, Barcelona, Spain.

\*Email: ptierno@ub.edu

**SUPPORTING VIDEO FILES.**

With the article 2 video clips are included in support of Fig.1 and Fig. 4.

**VideoS1**(.WMV): This videoclip shows the controlled bidirectional transport of two types of paramagnetic colloidal particles with size  $d=2.8 \mu\text{m}$  and  $d=1.0 \mu\text{m}$  driven above the FGF film. The applied field has amplitude  $H_0=1500 \text{ A/m}$ , anisotropy  $\beta = 0$  and angular frequency  $f = 3\text{Hz}$ . The videoclip corresponds to Fig.1(b) in the article.

**VideoS2**(.WMV): This videoclip shows the fractionation of a polydisperse suspension of paramagnetic colloids having 7 different sizes. The applied field has amplitude  $H_0=4300 \text{ A/m}$ , anisotropy  $\beta = 1.12$  and angular frequency  $f = 12\text{Hz}$ . This videoclip corresponds to the inset of Fig.4 of the article.
